# Supplementary material for: Efficient electrochemical determination of p-aminophenol using a novel tricomponent graphene-based nanocomposite
Source: Royal Society of Chemistry journal article supplement (doi:10.1039/c9nj03680f), 2019-01-01
Supplement: c9nj03680f1.pdf [file c9nj03680f1.pdf]

## Supporting Information

### Efficient electrochemical determination of *p*-aminophenol using a novel tricomponent graphene-based nanocomposite

Manorama Singh,<sup>a\*</sup> Anjumala Sahu,<sup>a</sup> Suhasini Mahata,<sup>a</sup> Puneet K Singh, Vijai K. Rai<sup>a</sup> and Ankita Rai<sup>b</sup>

Fig S1: FTIR of GO

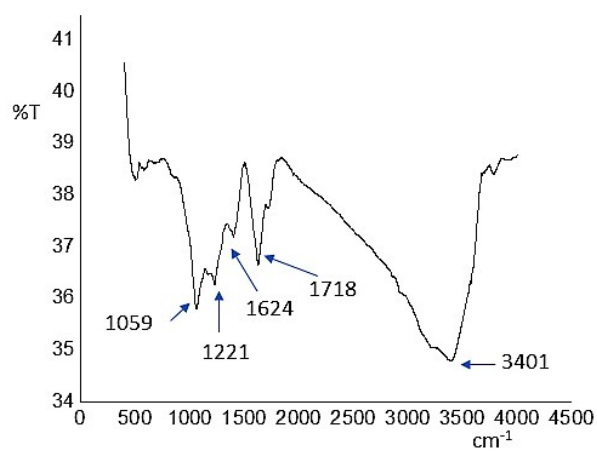

Fig S2: RAMAN of GO

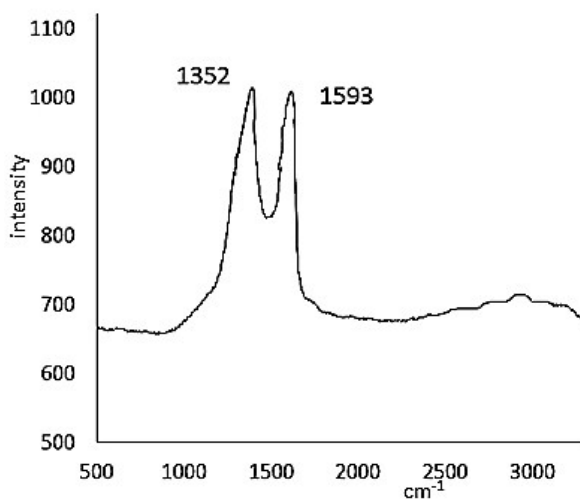

Fig S3: XRD of GO

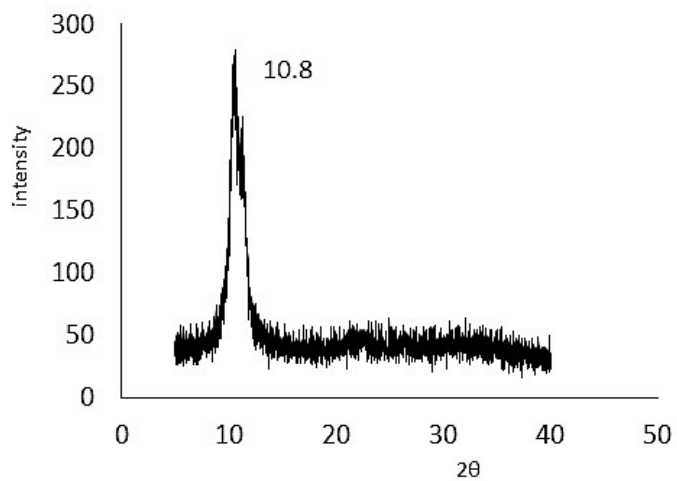

Fig S4:  $E_p$  vs pH

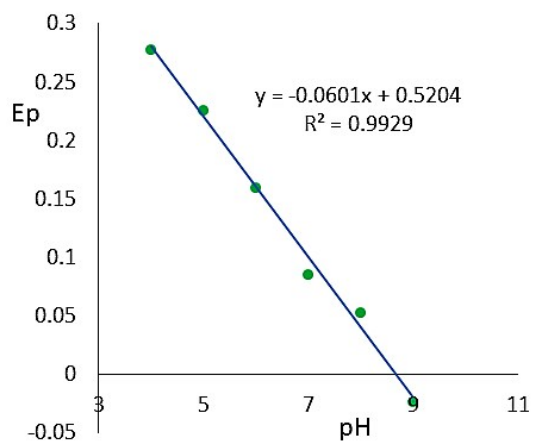

#### References:

- 1 G. Scandurra, A. Antonella, C. Ciofi, G. Saitta, M. Lanza, *Sensors*, 2014, 14, 8926-8939.
- 2 A. Sahu, P. Shukla, S. Mahata, V. K. Rai, A. Rai, M. Singh, *Sens. Actuat. B: Chem.*, 2019, 281, 1045-1053.
- 3 J. Shen, M. Shi, B. Yan, H. Ma, N. Li, Y. Hu, M. Ye, *Colloids Surf. B: Biointerfaces*, 2010, 81, 434-438.
- 4 P. Vecera, S. Eigler, M.K. Gray, V. Krstic, A. Vierck, J. Maultszsch, R. Schafer, F. Hauke, A. Hirsch. *Sci. Rep.*, 2017, 7, 45165-45172.
